45 FOX: cefoxitin  
46 FSIS: USDA Food Safety and Inspection Service  
47 GEN: gentamicin  
48 KAN: kanamycin  
49 ME: major error  
50 MIC: minimum inhibitory concentration  
51 NAL: nalidixic acid  
52 NARMS: National Antimicrobial Resistance Monitoring System  
53 SNP: single nucleotide polymorphism  
54 STR: streptomycin  
55 TET: tetracycline  
56 TIO: ceftiofur  
57 USDA: United States Department of Agriculture  
58 VME: very major error  
59 WGS: whole genome sequencing  
60 XGBoost: Extreme Gradient Boosting

61  
62  
63  
64  
65  
66  
67

68 **Keywords**

69 Machine learning  
70 Deep learning  
71 Antimicrobial susceptibility testing  
72 Genome sequencing  
73 Diagnostics

74  
75  
76

77 Nontyphoidal *Salmonella* species are the leading bacterial cause of food-borne disease in the  
78 United States. Whole genome sequences and paired antimicrobial susceptibility data are  
79 available for *Salmonella* strains because of surveillance efforts from public health agencies. In  
80 this study, a collection of 5,278 nontyphoidal *Salmonella* genomes, collected over 15 years in  
81 the United States, were used to generate XGBoost-based machine learning models for  
82 predicting minimum inhibitory concentrations (MICs) for 15 antibiotics. The MIC prediction  
83 models have average accuracies between 95-96% within  $\pm 1$  two-fold dilution factor and can  
84 predict MICs with no *a priori* information about the underlying gene content or resistance  
85 phenotypes of the strains. By selecting diverse genomes for training sets, we show that highly  
86 accurate MIC prediction models can be generated with fewer than 500 genomes. We also show  
87 that our approach for predicting MICs is stable over time despite annual fluctuations in  
88 antimicrobial resistance gene content in the sampled genomes. Finally, using feature selection,  
89 we explore the important genomic regions identified by the models for predicting MICs. To  
90 date, this is one of the largest MIC modeling studies to be published. Our strategy for  
91 developing whole genome sequence-based models for surveillance and clinical diagnostics can  
92 be readily applied to other important human pathogens.  
93  
94  
95

## 96 Introduction

97 Nontyphoidal *Salmonella* species are the leading bacterial cause of food-borne disease in the  
98 United States[1, 2], causing over one million illnesses per year[3] and an estimated 80 million  
99 illnesses annually world-wide[4]. Nontyphoidal *Salmonella* causes acute gastroenteritis and is  
100 usually contracted via fecal contamination of food sources[5]. Although these infections are  
101 usually self-limiting and typically do not require antibiotic treatment[6], severe infections can  
102 occur[7]. Antimicrobial resistance (AMR) is prevalent in *Salmonella* isolates and infections  
103 caused by highly antimicrobial resistant *Salmonella* strains result in worse outcomes than  
104 infections caused by susceptible strains[8-11].

105  
106 In 1996, the National Antimicrobial Resistance Monitoring System (NARMS) was established as  
107 a collaboration between the United States Centers for Disease Control and Prevention (CDC),  
108 U.S. Food and Drug Administration (FDA), U.S. Department of Agriculture (USDA), and state and  
109 local health departments. A primary goal of NARMS is to monitor antimicrobial resistance in  
110 *Salmonella* and other food-borne bacteria, including *Campylobacter*, *Escherichia* and  
111 *Enterococcus*[12]. The data collected by NARMS is used to inform public health decisions aimed  
112 at identifying contaminated food sources and reducing the spread of AMR through enhanced  
113 stewardship. In recent years, NARMS has adopted whole genome sequencing (WGS) as a  
114 routine monitoring tool. The WGS data are used to determine the source of outbreak strains,  
115 the virulence factor and AMR genes carried by each strain. As a result, a large collection of  
116 bacterial whole genome sequences with extensive metadata is available for downstream  
117 research efforts[13].

118  
119 Whole genome sequencing is now routinely used for public health surveillance and to guide  
120 diagnostic and patient care decisions[14-18]. For routine surveillance, WGS provides the  
121 highest possible resolution for individuating traits in bacteria, assessing phylogenetic  
122 relationships, conducting outbreak investigations, and predicting virulence and epidemicity.  
123 From the clinical perspective, rapid diagnostics are key to improving patient care. For a  
124 conventional microbiology laboratory diagnosis, the total time for organism growth, isolation,  
125 taxonomic identification, and antimicrobial minimum inhibitory concentration (MIC)  
126 determination may exceed 36 hours for relatively fast-growing bacteria and several days for  
127 slower growing organisms[19-21]. Since reducing the time to optimal antimicrobial therapy  
128 significantly improves patient outcomes[22-24], rapid sequencing-based approaches that  
129 predict MICs may have clinical utility. The extensive WGS datasets generated by health  
130 agencies and the scientific community, such as nontyphoidal *Salmonella* strains, provides the  
131 necessary training sets required for building predictive models.

132  
133 Several investigations have recently built models for predicting AMR phenotypes from WGS  
134 data. To date, the most common approach has relied on using a curated reference set of genes  
135 and polymorphisms that are implicated in AMR[25-33]. This reference-guided approach best  
136 predicts susceptibility and resistance when organisms are well studied and the AMR  
137 mechanisms are known. As larger collections of genomes have become available, several  
138 studies have used machine learning algorithms to predict susceptible and resistant  
139 phenotypes[27, 29, 31, 34-38]. By using WGS and AMR phenotype data to train a machine

140 learning model, predictions without *a priori* information about the underlying gene content of  
141 the genome or molecular mechanism for resistance to each agent are possible. Although this  
142 reference-free approach requires many genomes, it is unbiased and can potentially be used to  
143 enable the discovery of new genomic features that are involved in AMR[36, 37]. These two  
144 general approaches have also been used to predict MICs for *Streptococcus*, *Neisseria*, and  
145 *Klebsiella*[35, 38-40]. When a curated reference collection of genes and SNPs is used for  
146 predicting MICs, a rules-based or machine learning algorithm is required for determining how  
147 much a given feature contributes to the MIC. Thus, for MIC prediction, both reference-guided  
148 and reference-free approaches are expected to have similar advantages and disadvantages if  
149 the collection of genes and SNPs used by the reference-guided method is sufficient for  
150 predicting all MICs, including those that are in the susceptible range. For example, in previous  
151 work, we built a machine learning model to predict MICs for a comprehensive population-based  
152 collection of 1,668 *Klebsiella pneumoniae* clinical isolates[38]. For each genome, we used  
153 nucleotide 10-mers and the MICs for each antibiotic as features to train the model. Extreme  
154 gradient boosting (XGBoost) was chosen as the machine learning algorithm[41]. The model  
155 could rapidly predict the MICs for 20 antibiotics with an average accuracy of 92%. This  
156 demonstrated that it is possible to successfully predict MICs without using a precompiled set of  
157 AMR genes or polymorphisms.

158  
159 In this study, we build models that use whole genome sequence data to predict MICs for  
160 nontyphoidal *Salmonella* based on strains collected and sequenced by NARMS from 2002-2016.  
161 Our strategy can be used to guide responses to outbreaks and inform antibiotic stewardship  
162 decisions.

163  
164

## 165 **Materials and Methods**

166

### 167 **Genomes and Metadata**

168 A total of 5,278 nontyphoidal *Salmonella* genome sequences were used in this study. All strains  
169 were collected and sequenced as part of the NARMS program. The strains were recovered  
170 from either raw retail meat and poultry or directly from livestock animals at slaughter.  
171 Antimicrobial susceptibility testing was performed using broth microdilution on the Sensititre®  
172 system (Thermo Scientific) for 15 antibiotics: ampicillin (AMP), amoxicillin/clavulanic acid  
173 (AUG), ceftriaxone (AXO), azithromycin (AZI), chloramphenicol (CHL), ciprofloxacin (CIP),  
174 trimethoprim/sulfamethoxazole (COT), sulfisoxazole (FIS), cefoxitin (FOX), gentamicin (GEN),  
175 kanamycin (KAN), nalidixic acid (NAL), streptomycin (STR), tetracycline (TET), and ceftiofur (TIO)  
176 at FDA and USDA NARMS laboratories[13]. Clinical breakpoints are based on CLSI and FDA  
177 guidelines[42]. Whole genome sequencing was performed using the Illumina HiSeq and MiSeq  
178 platforms using standard methods[25]. Accession numbers and MICs for each isolate are listed  
179 in Table S1. All non-AMR metadata including serotypes, host, geographic location of isolation  
180 and isolation year were taken from the metadata associated with each NCBI SRA entry.

181

## 182 **Genomic Analyses**

183 The short read sequence data for each strain was assembled with the PATRIC genome assembly  
184 service[43], using the “Full SPAdes” pipeline which uses BayesHammer[44] for read correction  
185 and SPAdes for assembly[45]. All genomes were annotated using the PATRIC annotation  
186 service[43], which uses a variation of the RAST tool kit annotation pipeline[46]. Annotated  
187 genomes are available on the PATRIC website (<https://patricbrc.org>). PATRIC genome  
188 identifiers are displayed in Table S1. Protein annotations, including those specifically asserted  
189 to be involved in AMR[47] were downloaded from the PATRIC workspace and used for  
190 subsequent analyses. A phylogenetic tree was generated for the strains in the analysis by  
191 aligning the genes for the beta and beta prime subunits of the RNA polymerase using  
192 MAFFT[48], concatenating the alignments, and computing a tree with FastTree[49]. The tree  
193 was rendered using iTOL[50].

194

## 195 **MIC Prediction**

196 *Model Generation.* A model for predicting minimum inhibitory concentrations for the 15  
197 antibiotics was built following the methods previously described by Nguyen and colleagues[38].  
198 Briefly, each genome was divided into the set of nonredundant overlapping nucleotide 10-mers  
199 using the k-mer counting program KMC[51]. A matrix was built where the k-mers, antibiotics,  
200 and MICs are treated as features for each genome. Each row in the matrix contains the k-mers  
201 for a genome as well as the MIC for a single antibiotic. The MIC prediction model was built  
202 using an XGBoost[41] regressor predicting linearized MICs. All model parameters were identical  
203 to those used by Nguyen et al[38]. Ten-fold cross validations were used to assess the overall  
204 accuracy and sensitivity of every model used in this study. A non-overlapping training set (80%  
205 of the data), validation set (10% of the data), and test set (10% of the data) were generated for  
206 each fold. The validation set was used to monitor each model to prevent overfitting. Unless  
207 otherwise stated, the accuracy is reported as the ability to predict the correct MIC within  $\pm 1$   
208 two-fold dilution step of the laboratory-derived MIC. Defining an accuracy to be within one  
209 two-fold dilution step is consistent with FDA requirements for automated MIC measuring  
210 device standards and is consistent with established clinical microbiology practices[20, 52, 53].  
211 A comparison of raw accuracies and accuracies within  $\pm 1$  two-fold dilution step is shown in  
212 Table S2. To assess the accuracy of a model over various metadata categories including date,  
213 serotype source, and location, the training set genomes are used to make the model. The test  
214 set genomes are used to assess the model accuracy for a given fold. For models based on date  
215 ranges, all parameters are identical and the accuracy is reported over the genomes from the  
216 held-out dates.

217

218 *Subsampling.* In order to perform the model building on a machine with 1.5 TB of RAM  
219 (machines with more memory are currently somewhat uncommon), we reduced the matrix size  
220 to sets of size  $n$ , where  $n \leq 250, 500, 1000, 2000, 3000, 4000$ , and 4500 genomes respectively.  
221 To create a diverse subset of size  $n$ , a hierarchical clustering method[54] was used to create  $n$   
222 clusters by using the 10-mer distribution of each genome as input features. To avoid the curse  
223 of dimensionality[55, 56], the taxicab/Manhattan distance ( $L_1$  norm) was used, rather than the  
224 Euclidean distance ( $L_2$  norm), since previous research has shown it to be both computationally  
225 fast and more accurate for high dimensional data[57]. From the resulting  $n$  clusters, one

226 genome from each cluster was randomly selected from a uniform distribution to create the  
227 subset containing  $n$  genomes. For each subset of genomes, a matrix was generated, and  
228 models were generated as described above.

229

230 *Feature identification.* In order to unambiguously identify k-mers that are important to MIC  
231 prediction, we built separate models for each individual antibiotic using the method described  
232 above, except that we increased the k-mer length to 15 nucleotides in order to reduce the  
233 number of redundant k-mers within each genome and to enable analyses with BLAST[58]. We  
234 also measured k-mer hits as presence versus absence, rather than counts, in order to simplify  
235 the analysis. Each model was built using the set of 1,000 diverse genomes from the  
236 subsampling experiment described above and 10-fold cross validations were performed on  
237 each model.

238

239 XGBoost's internal feature importance was computed for each fold within the 10-fold cross  
240 validation. This results in an importance score per feature (15-mer) from each fold. In order to  
241 generate an overall importance score for the top features, we summed the feature importance  
242 scores from each fold for the top ten features. This overall importance score captures both the  
243 importance of the 15-mer to a given fold and the number of times that 15-mer was chosen as a  
244 top feature within each of the ten folds.

245

246 XGBoost's internal feature importance is unable to provide correlations between features and  
247 label values, and thus does not provide an indication of whether a k-mer is related to antibiotic  
248 resistance or susceptibility. This is partially due to the fact that many non-linear correlations  
249 exist that may use multiple features. In order to see if the high scoring k-mers correlate with  
250 resistance or susceptibility, we computed the distribution of MICs for the genomes containing  
251 each high scoring k-mer. For example, a k-mer conferring susceptibility should be found in  
252 more genomes with lower MICs, while a k-mer conferring resistance should exist in genomes  
253 with higher MICs. Each high scoring k-mer was also compared to the set of protein encoding  
254 genes within each *Salmonella* genome. If a k-mer was found within a known AMR gene, that  
255 gene was reported. Otherwise, all protein-encoding genes within 3kb of the k-mer were  
256 reported in order to assess the neighborhood of the k-mer.

257

258 To find k-mers that are being used by the individual antibiotic models to predict susceptible  
259 MICs, we computed the presence or absence of each k-mers with high XGBoost feature  
260 importance values (described above) for the entire data set of 5278 genomes. The k-mers with  
261 the largest difference in occurrence between the susceptible and resistant genomes are the  
262 ones that are being chosen by the models for predicting susceptible MICs. To demine if there  
263 were significant SNPs in these k-mers, we found the genomic features containing the k-mer—  
264 protein encoding gene, RNA gene, or intergenic region—using BLASTn[58]. The corresponding  
265 feature or region was then found for all genomes in the collection. The features were aligned  
266 using MAFFT[48] and manually curated using Jalview[59]. Poor quality sequence was removed,  
267 all duplicates and paralogs were removed, and the subalignment covering the k-mer was  
268 extracted. To prevent possible biases due to clonality that may exist in the full set of genomes,  
269 the analysis was repeated on the diverse subset of 1000 genomes (described above). We

270 report a SNP in a k-mer region as being significant if the susceptible and resistant sets are  
271 significantly different (P-value < 0.001) for a given nucleotide position based on a Chi-square  
272 test for both the full set of 5278 genomes and the set of 1000 diverse genomes. Sequence  
273 logos for k-mers containing significant SNPs were generated using WebLogo[60]. K-mers from  
274 the Azithromycin and Ciprofloxacin models were excluded from this analysis because they each  
275 had seven resistant genomes. Comparisons of codon usage were computed versus the genome  
276 average, genome mode, and high expression gene sets as described previously[61, 62].

277

### 278 **Software availability**

279 The *Salmonella* MIC prediction model based on 4,500 genomes—including the software and  
280 documentation for running the model—is available at our GitHub page,

281 [https://github.com/PATRIC3/mic\\_prediction](https://github.com/PATRIC3/mic_prediction).

282

283

## 284 **Results**

285

### 286 **Model Construction**

287 For this study, we used a publicly available collection of 5,278 *Salmonella* whole genome  
288 sequences generated by the NARMS project between 2002 and 2016. The strains were isolated  
289 from retail meat and food animal sources in the United States. The collection includes 98  
290 different serotypes, including Heidelberg (678 genomes), Kentucky (618 genomes), and  
291 Typhimurium var. 5- (588 genomes) from 41 states (Table S1). Isolates were tested for  
292 resistance to up to 15 antimicrobial agents using the broth microdilution method. Many of the  
293 strains were randomly selected for sequencing as part of a compulsory nation-wide collection  
294 program (Table 1).

295

296 The nontyphoidal *Salmonella* MIC prediction model was built similar to our previously  
297 described strategy used to predict MICs for *K. pneumoniae* clinical isolates[38]. Since the  
298 *Salmonella* data set has many more genomes and greater sampling in the range of susceptible  
299 MICs, it provides a critical test case for determining if the approach remains robust for other  
300 pathogens. In the *Klebsiella* study, we built individual models for each antibiotic, as well as a  
301 single large integrated model by combining the data from all antibiotics. We found that the  
302 combined model achieved slightly higher overall accuracies (by ~1-2%), however the matrix  
303 that was necessary to train this model had a large memory footprint. Indeed, if we were to  
304 build a similar matrix for the current *Salmonella* data set using all 5,278 genomes, the model  
305 training would exceed 1.5 TB of RAM. Therefore, we first built models for all antibiotics using  
306 subsets of the genomes ranging in size from 250-4,500 genomes that were rationally selected  
307 to maximize genetic diversity (Figure 1). A matrix built from 4,500 genomes is the largest we  
308 can train on a 1.5 TB machine using this protocol. As the training set size increases from 250 to  
309 1000 genomes, the accuracy increases from 88.5% to 91.4%. Then as the training set increases  
310 beyond 1000 genomes, the accuracy continues to improve more modestly, with the 4,500-  
311 genome model having an average accuracy of 95.2%. Results indicate that the overall MIC  
312 prediction approach, which was developed previously for *Klebsiella pneumoniae*, also works for  
313 *Salmonella* despite the differences in sampling, genetic diversity and MICs. Also, we discovered



314 that a smaller number of well-chosen diverse genomes can serve as a useful proxy for  
315 representing the entire set, since models built from  $\geq 500$  genomes have accuracies exceeding  
316 90%.

317

### 318 **Model Accuracy**

319 We computed the overall accuracy for each antibiotic using the model that is based on 4,500  
320 genomes. For this model, all 15 antibiotics have average accuracies  $\geq 90\%$ , with their  $Q_1$  quartile  
321 bound  $\geq 89\%$  (Figure 2). Chloramphenicol and ceftiofur had the highest accuracies (99%), and  
322 gentamicin and tetracycline had the lowest accuracies (91% and 90%, respectively) (Table S2).  
323 Since the model is robust to the various mechanisms of resistance for the 15 antibiotics, it is  
324 possible that the slightly lower accuracies for gentamicin and tetracycline could be due to the  
325 distribution of multiple AMR genes/mechanisms across the population of strains with resistant  
326 genomes (which will be analyzed in more detail below). Figure 3 depicts the accuracy of the  
327 4,500-genome model for each MIC. Overall, the model is robust for both the resistant and  
328 susceptible MICs, and it tends to be more accurate when a MIC is represented by many  
329 genomes. The model tends to have lower accuracies for the highest and lowest MICs, perhaps  
330 because of underlying genetic differences between strains that have been reported with  $\geq$  or  $\leq$   
331 values, which represents a range of MICs rather than a discrete value.

332

333 The utility of AMR diagnostic devices is often described in terms of error rate. Major errors  
334 (MEs) are defined as susceptible genomes that have been incorrectly assigned resistant MICs by  
335 the model. Very major errors (VMEs) are defined as resistant genomes that have been  
336 incorrectly assigned susceptible MICs by the model. FDA standards for automated systems  
337 recommend a major error rate  $\leq 3\%$ [53]. All antibiotics used in the model have ME rates within  
338 this range (Table 2). The FDA standards for VME rates indicate that the lower 95% confidence  
339 limit should be  $\leq 1.5\%$  and upper limit should be  $\leq 7.5\%$ [53]. Seven of the 15 antibiotics—  
340 amoxicillin/clavulanic acid, ceftriaxone, chloramphenicol, cefoxitin, streptomycin, tetracycline  
341 and ceftiofur—have acceptable VME rates by this measure. Ampicillin and sulfisoxazole have  
342 VME rates with 95% confidence intervals approaching this range: [0.022, 0.033] and [0.026,  
343 0.053] respectively. The VME rates are higher for some of the remaining antibiotics because  
344 there are fewer resistant genomes. As more resistant genomes are collected, and the data set  
345 becomes more balanced, we expect VME rates to be reduced.

346

347 In addition to the extensive MIC data, NARMS reports rich metadata including isolation date,  
348 food or animal source, collection year, geographic location and serotype. We computed the  
349 accuracy of the model over each available metadata category to determine if the model is  
350 robust to these differences and to ensure that no subset is biasing the model. The genomes  
351 span a 15-year collection period, with all the years except 2002 (the oldest) and 2016 (the most  
352 recent) having over 100 isolates. The model accuracy ranges from 94-97% over each collection  
353 year (Table 3). That is, the genetic factors that contribute to the MICs have either remained  
354 stable over the 15-year period or have been learned as the model was trained. Although the  
355 data set is mostly comprised of poultry meat or live animal isolates, the accuracy ranges  
356 between 94-96% over the four contamination sources: turkey, beef, pork, and chicken (Table  
357 4). No obvious biases were detected in the accuracies based on the state of isolation (an

358 average of 95% accuracy over 41 states with a 95% CI equal to [0.95-0.96]) (Figure 4) or the  
359 serovars of each isolate (94% accuracy over 97 serovars with a 95% CI equal to [0.94-0.96])  
360 (Table S3). Since the traditional *Salmonella* serotyping scheme is based the lipopolysaccharide  
361 O and flagellar H antigens, which are encoded by genes that influence the cell surface[63], we  
362 also constructed a phylogenetic tree for *Salmonella* genomes to observe the model accuracy  
363 over the various clades. Overall, no phylogenetic bias in the model accuracy was detected  
364 (Figure S1).

365  
366 One concern of using a model that is trained on the data from previous years, in some cases  
367 over 15 years old, is that the training set is not representative of currently circulating strains.  
368 That is, the model may be inaccurate for predicting MICs for genomes of strains that are  
369 currently circulating or will emerge in the future. For example, shifts in clonal groups, evolution  
370 of AMR-associated genes, or introduction of AMR genes by horizontal gene transfer is  
371 possible[64, 65]. We evaluated this possibility by building models from subsets of the whole  
372 genome sequence data using strains collected in earlier years and measuring the accuracy of  
373 the models on genomes collected in later years. Models were built for years prior to 2009  
374 through 2014 and tested on the remaining genomes (Table 5). These models have accuracies  
375 ranging from 86-92%. As the number of years used for building the models increases, the  
376 number of genomes available for testing decreases, so we also tested each model on only the  
377 462 genomes from 2015 and 2016. Similarly, the accuracy of each model on the 2015 and 2016  
378 genomes ranges from 87-90% (Table S4). The results indicate that within this data set, models  
379 generated from genomes collected at earlier dates yield stable MIC predictions for genomes  
380 collected at later dates. This finding is consistent with the pattern of AMR genes that is  
381 observed within the data set. Although AMR gene content may vary from year to year, we do  
382 not observe any major sweeps or fixation events that drastically alter the AMR gene content of  
383 the collection between years, which would cause the MIC predictions to fail for a large fraction  
384 of the genomes (Table S5). Taken together, these data suggest that the MIC prediction models  
385 generated in this study are likely to be sustainable over time.

### 386 387 **Genomic regions important for MIC prediction**

388 The 4,500-genome model described above contains data from all antibiotics and MICs, making  
389 feature extraction to determine which k-mers contribute to the MIC predictions for each  
390 antibiotic difficult. To address this limitation, we modified the protocol by building separate  
391 models for each antibiotic. Instead of using 10-mers, we increased the k-mer length to 15  
392 nucleotides to reduce redundancy and make them identifiable using BLAST[58]. We also  
393 searched for presence or absence of k-mers, rather than using k-mer counts, to simplify the  
394 analysis of the XGBoost decision trees. Since a 15-mer matrix can be 4<sup>5</sup> times larger than a 10-  
395 mer matrix, we used <= 1000 diverse genomes to reduce the memory footprint during training.  
396 Overall, the average accuracy for the individual models is nearly identical to the average  
397 accuracy for the combined 4,500-genome model (96% vs. 95%, respectively), and in nearly all  
398 cases, the 95% confidence intervals overlap between the combined and single antibiotic models  
399 (Table S6). Thus, for this data set, single antibiotic models with fewer genomes and larger k-  
400 mers perform as well as a combined model (Figure S2).

401

402 During model training, XGBoost assigns an importance value to each k-mer used in a decision  
403 tree. When the model is used to predict the MICs for a new genome, the k-mers with the  
404 highest importance values are the most informative for the MIC prediction. Thus, by analyzing  
405 the feature importance values of each k-mer, we can use the models as a tool for  
406 understanding the genomic regions that differentiate MICs. For each antibiotic-specific model,  
407 we parsed the XGBoost decision trees from each fold of the ten-fold cross validation to extract  
408 the importance values for each k-mer. To understand the relationship between known AMR  
409 genes and the important k-mers that were chosen by each model, we then searched for k-mers  
410 with high importance values within AMR genes that occur in close proximity to an AMR gene (in  
411 this case, we consider a window of 3kb, approximately 3 genes, to be a close proximity). Table  
412 6 lists the highest-ranking k-mers from each model that occur within or in close proximity to an  
413 AMR gene. In most cases, the k-mers correspond to known AMR genes including class A and C  
414 beta-lactamases for the beta lactam antibiotics, aminoglycoside nucleotidyl- and  
415 acetyltransferases for the aminoglycosides, DNA gyrase and QnrB for the fluoroquinolones,  
416 TetA and TetR for tetracycline, and dihydrofolate reductase and dihydropteroate synthase for  
417 co-trimoxazole and sulfisoxazole. In the case of azithromycin, the collection contains mostly  
418 susceptible genomes (Table 1), so the first macrolide resistance gene observed corresponds  
419 with the eighth ranking k-mer. The top ten k-mers with the highest feature importance values  
420 from each of the ten folds used in model training are listed in Tables S7-S21. In addition to the  
421 top AMR k-mers displayed in Table 6, these tables show other highly ranking k-mers from the  
422 same AMR genes as well as k-mers from related genes that are known to confer resistance to  
423 the given antibiotic. In some cases, k-mers matching regions or genes from unrelated AMR  
424 mechanisms have high importance values, suggesting a pattern of co-occurrence on  
425 horizontally transferred genetic elements.

426  
427 Since each model is predicting the entire range of MICs, some of the highly ranking k-mers will  
428 be used to predict susceptible MICs. To assess this, we computed the fraction of susceptible  
429 and resistant genomes with each k-mer from Tables S7-21. The set of k-mers that are most  
430 enriched in the susceptible genomes is shown in Table 7. Overall, seven of the top ten k-mers  
431 represent significantly different SNPs (P-value < 0.001) in both the complete set of 5,278  
432 genomes and in the set of 1,000 diverse genomes used to build the models (Figure S3). The top  
433 k-mer associated with susceptibility is from the nalidixic acid model and occurs in the DNA  
434 gyrase *gyrA* gene. This is also the top k-mer that was found in an AMR gene for nalidixic acid  
435 from Table 6. In this case, the model is relying more heavily on the “wild type” version of the k-  
436 mer rather than any of the resistant versions (the remaining k-mers from Table 6 occur almost  
437 exclusively in resistant genomes). The same *gyrA* k-mer is also found as a highly ranking k-mer  
438 in the case of ciprofloxacin (Table S12). Two significant *gyrA* SNPs are captured by this k-mer  
439 (Figure S3). These are missense mutations in the resistant genomes occurring at Ser-83 and  
440 Asp-87, and changes at these positions have been shown to confer quinolone resistance in *E.*  
441 *coli* [66, 67]. The remaining significant mutations from Figure S3 that occur in the protein-  
442 encoding genes are same sense (not amino acid changing) mutations. In the cases of *eptA* (Ser,  
443 TCG to TCA), *oadA* (Ala, GCC to GCA), the AraJ precursor gene (Leu, CTG to CTA), and the second  
444 *gcd* mutation (Thr, ACG to ACA), the codon changes from a commonly used codon in the  
445 susceptible genomes to the least preferred codon in the resistant genomes. In the cases of the

446 *nrfE/nrfF* mutation (Asn, AAT to AAC) and the first *gcd* mutation (Asp, GAC to GAT), the  
447 resistant genomes have the preferred codon of the pair. Whether these SNPs have a  
448 modulating effect on protein translation or contribute to the fitness of the resistant organisms  
449 requires further analysis.

450

451

## 452 Discussion

453 In this study, we have built machine learning-based MIC prediction models for nontyphoidal  
454 *Salmonella* genomes using XGBoost[41] that achieve overall accuracies of 95-96% within  $\pm 1$   
455 two-fold dilution factor. To our knowledge, this is one of the largest and most accurate MIC  
456 prediction models to be published to date. Importantly, it provides a model strategy for  
457 performing MIC prediction directly from genome sequence data that could be applied to other  
458 human or veterinary pathogens.

459

460 The success of our MIC prediction model was dependent on the large, publicly available,  
461 population-based collection of genomes with associated metadata. Since researchers often  
462 focus on collecting highly resistant or otherwise unusual strains, the opportunities to generate  
463 balanced models are rare. We demonstrate the many benefits from comprehensive sampling  
464 for the entire range of possible MICs. First, diverse and balanced data sets improve model  
465 accuracies because there is better sampling across all MIC dilutions. Second, having balanced  
466 data enabled us to achieve acceptable ME and VME rates for 7 of the 15 antibiotics used in the  
467 study. Third, compared with our recent model for *Klebsiella pneumoniae*, the larger and more  
468 balanced data set in nontyphoidal *Salmonella* enabled us to build models for individual  
469 antibiotics that had similar accuracies to the combined model. This enabled us to begin to  
470 disambiguate the important genomic regions relating to resistant and susceptible MICs. Finally,  
471 we show that MICs in the susceptible range can be accurately predicted with the algorithm  
472 using all genomic data rather than scoping it to known AMR genes or gene polymorphisms.  
473 This contrasts with prior work correlating MICs to known resistance mechanisms in  
474 *Salmonella*[68]. In future studies, our strategy could be used as a starting point for identifying  
475 the subtle genomic changes that result in different MICs.

476

477 For each single-antibiotic model, we analyzed the k-mers that had high feature importance  
478 values and were important to the models for predicting MICs. The highly ranking k-mers that  
479 were enriched in the resistant genomes mainly occurred within or in close proximity to well-  
480 known AMR genes. With the exception of the *gyrA* k-mer, the highly ranking k-mers that were  
481 enriched in the susceptible genomes were significant in several cases, but more difficult to  
482 interpret. Some of these susceptibility k-mers hint at a possible relationship between AMR and  
483 oxidative stress or electron transport, such as the k-mers matching components of the nitrate  
484 and nitrite reductases and pqq-dependent glucose dehydrogenase, which is consistent with the  
485 known link between antibiotics to oxidative stress[69, 70]. Determining the molecular  
486 mechanisms underlying the susceptibility k-mers and AMR phenotypes should be further  
487 investigated.

488

489 The genomes in this study were collected over a 15-year period from 41 U.S. states. By building  
490 models encompassing ranges of earlier dates, we demonstrated stable and accurate MIC  
491 prediction for genomes collected at later dates. Presently, we are not aware of any large  
492 publicly available collections of *Salmonella* genomes with MIC data from other countries. Since  
493 AMR gene content may vary across pathogen populations, validation of the *Salmonella* models  
494 using strains from other countries is important to its application in global health. Nevertheless,  
495 the present analysis clearly demonstrates that current model provides accurate MIC predictions  
496 for United States isolates. Similarly, an analysis of this model on *Salmonella typhi* strains would  
497 provide information about the utility of the model over broader phylogenetic distances.  
498  
499

## 500 **Acknowledgements**

501 This work was supported by the National Institute of Allergy and Infectious Diseases, National  
502 Institutes of Health, Department of Health and Human Service [Contract No.  
503 HHSN272201400027C]. We thank Emily Dietrich for her helpful edits.  
504

## 505 **Author contribution statement**

506 MN: study design, experiments, data generation manuscript preparation, SWL: study design,  
507 PFM: study design, data generation, RJO: study design, RO: software engineering, RLS: study  
508 design, GHT: study design, data generation, SZ: study design, data generation, JJD: study design,  
509 data generation, manuscript preparation  
510

## 511 **Additional Information**

512 **Accession Codes:** Data are available under bioprojects PRJNA292661 and  
513 PRJNA292666. SRA run accession for each genome are displayed in (Table S1).  
514

515 **Competing financial interests:** The authors claim no competing financial interests.  
516

## 517 **Disclaimer**

518 The views expressed in this article are those of the authors and do not necessarily reflect the  
519 official policy of the Department of Health and Human Services, the U.S. Food and Drug  
520 Administration, and Centers for Disease Control and Prevention or the U.S. Government.  
521 Mention of trade names or commercial products in this publication is solely for the purpose of  
522 providing specific information and does not imply recommendation or endorsement by the U.S.  
523 Department of Agriculture or Food and Drug Administration.  
524  
525

## 526 References

- 527 1. Centers for Disease Control and Prevention (CDC). Surveillance for Foodborne Disease  
528 Outbreaks, United States, 2015, Annual Report. Atlanta, Georgia: US Department of Health and  
529 Human Services, CDC. 2017. Available from:  
530 [https://www.cdc.gov/foodsafety/pdfs/2015FoodBorneOutbreaks\\_508.pdf](https://www.cdc.gov/foodsafety/pdfs/2015FoodBorneOutbreaks_508.pdf).
- 531 2. Crim SM, Griffin PM, Tauxe R, Marder EP, Gilliss D, Cronquist AB, et al. Preliminary  
532 incidence and trends of infection with pathogens transmitted commonly through food-  
533 Foodborne Diseases Active Surveillance Network, 10 US sites, 2006-2014. MMWR Morbidity  
534 and mortality weekly report. 2015;64(18):495-9.
- 535 3. Scallan E, Hoekstra RM, Widdowson M, Hall A, Griffin P. Foodborne illness acquired in  
536 the United States. Emerging Infectious Diseases. 2011;17(7):1339-40.
- 537 4. World Health Organization. WHO estimates of the global burden of foodborne diseases:  
538 foodborne disease burden epidemiology reference group 2007-2015. 2015.
- 539 5. Andino A, Hanning I. *Salmonella enterica*: survival, colonization, and virulence  
540 differences among serovars. The Scientific World Journal. 2015;2015.
- 541 6. Aserkoff B, Bennett JV. Effect of antibiotic therapy in acute salmonellosis on the fecal  
542 excretion of salmonellae. N Engl J Med. 1969;281(12):636-40. Epub 1969/09/18. doi:  
543 10.1056/NEJM196909182811202.
- 544 7. Crump JA, Sjölund-Karlsson M, Gordon MA, Parry CM. Epidemiology, clinical  
545 presentation, laboratory diagnosis, antimicrobial resistance, and antimicrobial management of  
546 invasive *Salmonella* infections. Clinical microbiology reviews. 2015;28(4):901-37.
- 547 8. Varma JK, Mølbak K, Barrett TJ, Beebe JL, Jones TF, Rabatsky-Ehr T, et al. Antimicrobial-  
548 resistant nontyphoidal *Salmonella* is associated with excess bloodstream infections and  
549 hospitalizations. The Journal of infectious diseases. 2005;191(4):554-61.
- 550 9. Varma JK, Greene KD, Ovitt J, Barrett TJ, Medalla F, Angulo FJ. Hospitalization and  
551 antimicrobial resistance in *Salmonella* outbreaks, 1984–2002. Emerging Infectious Diseases.  
552 2005;11(6):943.
- 553 10. Krueger AL, Greene SA, Barzilay EJ, Henao O, Vugia D, Hanna S, et al. Clinical outcomes  
554 of nalidixic acid, ceftriaxone, and multidrug-resistant nontyphoidal *Salmonella* infections  
555 compared with pansusceptible infections in FoodNet sites, 2006–2008. Foodborne pathogens  
556 and disease. 2014;11(5):335-41.
- 557 11. Angulo FJ, Mølbak K. Human health consequences of antimicrobial drug-resistant  
558 *Salmonella* and other foodborne pathogens. Clinical infectious diseases. 2005;41(11):1613-20.
- 559 12. Karp BE, Tate H, Plumblee JR, Dessai U, Whichard JM, Thacker EL, et al. National  
560 Antimicrobial Resistance Monitoring System: Two Decades of Advancing Public Health Through  
561 Integrated Surveillance of Antimicrobial Resistance. Foodborne pathogens and disease.  
562 2017;14(10):545-57.
- 563 13. Food and Drug Administration (FDA). NARMS Now. Rockville, MD: 2018. Available from:  
564 <https://www.fda.gov/AnimalVeterinary/SafetyHealth/AntimicrobialResistance/NationalAntimicrobialResistanceMonitoringSystem/ucm416741.htm>.
- 565  
566 14. Abrams AJ, Trees DL. Genomic sequencing of *Neisseria gonorrhoeae* to respond to the  
567 urgent threat of antimicrobial-resistant gonorrhea. Pathogens and disease. 2017;75(4).

- 568 15. Goldberg B, Sichtig H, Geyer C, Ledebner N, Weinstock GM. Making the leap from  
569 research laboratory to clinic: challenges and opportunities for next-generation sequencing in  
570 infectious disease diagnostics. *MBio*. 2015;6(6):e01888-15.
- 571 16. Didelot X, Bowden R, Wilson DJ, Peto TE, Crook DW. Transforming clinical microbiology  
572 with bacterial genome sequencing. *Nature Reviews Genetics*. 2012;13(9):601.
- 573 17. Brown EW, Gonzalez-Escalona N, Stones R, Timme R, Allard MW. The Rise of Genomics  
574 and the Promise of Whole Genome Sequencing for Understanding Microbial Foodborne  
575 Pathogens. *Foodborne Pathogens: Springer*; 2017. p. 333-51.
- 576 18. McArthur AG, Tsang KK. Antimicrobial resistance surveillance in the genomic age. *Annals  
577 of the New York Academy of Sciences*. 2017;1388(1):78-91.
- 578 19. Opota O, Croxatto A, Prod'homme G, Greub G. Blood culture-based diagnosis of  
579 bacteraemia: state of the art. *Clinical Microbiology and Infection*. 2015;21(4):313-22.
- 580 20. Reller LB, Weinstein M, Jorgensen JH, Ferraro MJ. Antimicrobial susceptibility testing: a  
581 review of general principles and contemporary practices. *Clinical infectious diseases*.  
582 2009;49(11):1749-55.
- 583 21. Saha SK, Darmstadt GL, Baqui AH, Hanif M, Ruhulamin M, Santosham M, et al. Rapid  
584 identification and antibiotic susceptibility testing of *Salmonella enterica* serovar Typhi isolated  
585 from blood: implications for therapy. *Journal of clinical microbiology*. 2001;39(10):3583-5.
- 586 22. Llor C, Bjerrum L. Antimicrobial resistance: risk associated with antibiotic overuse and  
587 initiatives to reduce the problem. *Therapeutic advances in drug safety*. 2014;5(6):229-41.
- 588 23. Kumar A, Roberts D, Wood KE, Light B, Parrillo JE, Sharma S, et al. Duration of  
589 hypotension before initiation of effective antimicrobial therapy is the critical determinant of  
590 survival in human septic shock. *Critical care medicine*. 2006;34(6):1589-96.
- 591 24. Palmer H, Palavecino E, Johnson J, Ohl C, Williamson J. Clinical and microbiological  
592 implications of time-to-positivity of blood cultures in patients with Gram-negative bacilli  
593 bacteremia. *European journal of clinical microbiology & infectious diseases*. 2013;32(7):955-9.
- 594 25. McDermott PF, Tyson GH, Kabera C, Chen Y, Li C, Folster JP, et al. Whole-genome  
595 sequencing for detecting antimicrobial resistance in nontyphoidal *Salmonella*. *Antimicrobial  
596 agents and chemotherapy*. 2016;60(9):5515-20.
- 597 26. Hunt M, Mather AE, Sánchez-Busó L, Page AJ, Parkhill J, Keane JA, et al. ARIBA: rapid  
598 antimicrobial resistance genotyping directly from sequencing reads. *Microbial genomics*.  
599 2017;3(10).
- 600 27. Niehaus KE, Walker TM, Crook DW, Peto TE, Clifton DA, editors. Machine learning for  
601 the prediction of antibacterial susceptibility in *Mycobacterium tuberculosis*. 2014 IEEE-EMBS  
602 International Conference on Biomedical and Health Informatics (BHI); 2014: IEEE.
- 603 28. Stoesser N, Batty E, Eyre D, Morgan M, Wyllie D, Del Ojo Elias C, et al. Predicting  
604 antimicrobial susceptibilities for *Escherichia coli* and *Klebsiella pneumoniae* isolates using whole  
605 genomic sequence data. *Journal of Antimicrobial Chemotherapy*. 2013;68(10):2234-44.
- 606 29. Pesesky MW, Hussain T, Wallace M, Patel S, Andleeb S, Burnham C-AD, et al. Evaluation  
607 of machine learning and rules-based approaches for predicting antimicrobial resistance profiles  
608 in Gram-negative Bacilli from whole genome sequence data. *Frontiers in microbiology*.  
609 2016;7:1887.

- 610 30. Lipworth SIW, Hough N, Leach L, Morgan M, Jeffrey K, Andersson M, et al. Whole  
611 genome sequencing for predicting *Mycobacterium abscessus* drug susceptibility. *bioRxiv*.  
612 2018:251918.
- 613 31. Bradley P, Gordon NC, Walker TM, Dunn L, Heys S, Huang B, et al. Rapid antibiotic-  
614 resistance predictions from genome sequence data for *Staphylococcus aureus* and  
615 *Mycobacterium tuberculosis*. *Nature communications*. 2015;6:10063.
- 616 32. Harrison OB, Clemence M, Dillard JP, Tang CM, Trees D, Grad YH, et al. Genomic  
617 analyses of *Neisseria gonorrhoeae* reveal an association of the gonococcal genetic island with  
618 antimicrobial resistance. *Journal of Infection*. 2016;73(6):578-87.
- 619 33. Grad YH, Harris SR, Kirkcaldy RD, Green AG, Marks DS, Bentley SD, et al. Genomic  
620 epidemiology of gonococcal resistance to extended-spectrum cephalosporins, macrolides, and  
621 fluoroquinolones in the United States, 2000–2013. *The Journal of infectious diseases*.  
622 2016;214(10):1579-87.
- 623 34. Coelho JR, Carriço JA, Knight D, Martínez J-L, Morrissey I, Oggioni MR, et al. The use of  
624 machine learning methodologies to analyse antibiotic and biocide susceptibility in  
625 *Staphylococcus aureus*. *PLoS One*. 2013;8(2):e55582.
- 626 35. Eyre DW, De Silva D, Cole K, Peters J, Cole MJ, Grad YH, et al. WGS to predict antibiotic  
627 MICs for *Neisseria gonorrhoeae*. *Journal of Antimicrobial Chemotherapy*. 2017;72(7):1937-47.
- 628 36. Drouin A, Giguère S, Déraspe M, Marchand M, Tyers M, Loo VG, et al. Predictive  
629 computational phenotyping and biomarker discovery using reference-free genome  
630 comparisons. *BMC genomics*. 2016;17(1):754.
- 631 37. Davis JJ, Boisvert S, Brettin T, Kenyon RW, Mao C, Olson R, et al. Antimicrobial resistance  
632 prediction in PATRIC and RAST. *Scientific reports*. 2016;6:27930.
- 633 38. Nguyen M, Brettin T, Long SW, Musser JM, Olsen RJ, Olson R, et al. Developing an in  
634 silico minimum inhibitory concentration panel test for *Klebsiella pneumoniae*. *Scientific reports*.  
635 2018;8(1):421.
- 636 39. Metcalf BJ, Chochua S, Gertz R, Li Z, Walker H, Tran T, et al. Using whole genome  
637 sequencing to identify resistance determinants and predict antimicrobial resistance phenotypes  
638 for year 2015 invasive pneumococcal disease isolates recovered in the United States. *Clinical  
639 Microbiology and Infection*. 2016;22(12):1002. e1- e8.
- 640 40. Li Y, Metcalf BJ, Chochua S, Li Z, Gertz RE, Walker H, et al. Penicillin-binding protein  
641 transpeptidase signatures for tracking and predicting  $\beta$ -lactam resistance levels in  
642 *Streptococcus pneumoniae*. *MBio*. 2016;7(3):e00756-16.
- 643 41. Chen T, Guestrin C, editors. XGBoost: A scalable tree boosting system. *Proceedings of  
644 the 22nd acm sigkdd international conference on knowledge discovery and data mining; 2016:  
645 ACM*.
- 646 42. US Food and Drug Administration (FDA). National Antimicrobial Resistance Monitoring  
647 System—Enteric Bacteria (NARMS): 2011 executive report. US Department of Health and Human  
648 Services. Food and Drug Administration, Rockville, MD. 2013.
- 649 43. Wattam AR, Davis JJ, Assaf R, Boisvert S, Brettin T, Bun C, et al. Improvements to  
650 PATRIC, the all-bacterial bioinformatics database and analysis resource center. *Nucleic acids  
651 research*. 2016;45(D1):D535-D42.
- 652 44. Nikolenko SI, Korobeynikov AI, Alekseyev MA, editors. BayesHammer: Bayesian  
653 clustering for error correction in single-cell sequencing. *BMC genomics; 2013: BioMed Central*.



- 654 45. Bankevich A, Nurk S, Antipov D, Gurevich AA, Dvorkin M, Kulikov AS, et al. SPAdes: a  
655 new genome assembly algorithm and its applications to single-cell sequencing. *Journal of*  
656 *computational biology*. 2012;19(5):455-77.
- 657 46. Brettin T, Davis JJ, Disz T, Edwards RA, Gerdes S, Olsen GJ, et al. RASTtk: a modular and  
658 extensible implementation of the RAST algorithm for building custom annotation pipelines and  
659 annotating batches of genomes. *Scientific reports*. 2015;5:8365.
- 660 47. Antonopoulos DA, Assaf R, Aziz RK, Brettin T, Bun C, Conrad N, et al. PATRIC as a unique  
661 resource for studying antimicrobial resistance. *Briefings in bioinformatics*. 2017.
- 662 48. Katoh K, Standley DM. MAFFT multiple sequence alignment software version 7:  
663 improvements in performance and usability. *Molecular biology and evolution*. 2013;30(4):772-  
664 80.
- 665 49. Price MN, Dehal PS, Arkin AP. FastTree 2—approximately maximum-likelihood trees for  
666 large alignments. *PloS one*. 2010;5(3):e9490.
- 667 50. Letunic I, Bork P. Interactive Tree Of Life (iTOL): an online tool for phylogenetic tree  
668 display and annotation. *Bioinformatics*. 2006;23(1):127-8.
- 669 51. Deorowicz S, Kokot M, Grabowski S, Debudaj-Grabysz A. KMC 2: fast and resource-frugal  
670 k-mer counting. *Bioinformatics*. 2015;31(10):1569-76.
- 671 52. Jorgensen JH. Selection criteria for an antimicrobial susceptibility testing system. *Journal*  
672 *of clinical microbiology*. 1993;31(11):2841.
- 673 53. US Food and Drug Administration (FDA). Class II Special Controls Guidance Document:  
674 Antimicrobial Susceptibility Test (AST) Systems. Rockville, MD: US FDA. 2009.
- 675 54. Pedregosa F, Varoquaux G, Gramfort A, Michel V, Thirion B, Grisel O, et al. Scikit-learn:  
676 Machine Learning in Python. *Journal of Machine Learning Research*. 2011;12:2825--30.
- 677 55. Bellman R. Dynamic programming. Princeton: Princeton University Press; 2013.
- 678 56. Shalev-Shwartz S, Ben-David S. Understanding machine learning: From theory to  
679 algorithms: Cambridge University Press; 2014.
- 680 57. Aggarwal CC, Hinneburg A, Keim DA, editors. On the surprising behavior of distance  
681 metrics in high dimensional space. *International conference on database theory*; 2001:  
682 Springer.
- 683 58. Camacho C, Coulouris G, Avagyan V, Ma N, Papadopoulos J, Bealer K, et al. BLAST+:  
684 architecture and applications. *BMC bioinformatics*. 2009;10(1):421.
- 685 59. Waterhouse AM, Procter JB, Martin DM, Clamp M, Barton GJ. Jalview Version 2—a  
686 multiple sequence alignment editor and analysis workbench. *Bioinformatics*. 2009;25(9):1189-  
687 91.
- 688 60. Crooks GE, Hon G, Chandonia J-M, Brenner SE. WebLogo: A Sequence Logo Generator.  
689 *Genome Research*. 2004;14(6):1188-90. doi: 10.1101/gr.849004. PubMed PMID: PMC419797.
- 690 61. Davis JJ, Olsen GJ. Modal codon usage: assessing the typical codon usage of a genome.  
691 *Molecular biology and evolution*. 2009;27(4):800-10.
- 692 62. Davis JJ, Olsen GJ. Characterizing the native codon usages of a genome: an axis  
693 projection approach. *Molecular biology and evolution*. 2010;28(1):211-21.
- 694 63. Ranieri ML, Shi C, Switt AIM, Den Bakker HC, Wiedmann M. Comparison of typing  
695 methods with a new procedure based on sequence characterization for *Salmonella* serovar  
696 prediction. *Journal of clinical microbiology*. 2013;51(6):1786-97.

- 697 64. Zhu L, Olsen RJ, Nasser W, Beres SB, Vuopio J, Kristinsson KG, et al. A molecular trigger  
698 for intercontinental epidemics of group A *Streptococcus*. The Journal of clinical investigation.  
699 2015;125(9):3545-59.
- 700 65. Nasser W, Beres SB, Olsen RJ, Dean MA, Rice KA, Long SW, et al. Evolutionary pathway  
701 to increased virulence and epidemic group A *Streptococcus* disease derived from 3,615 genome  
702 sequences. Proceedings of the National Academy of Sciences. 2014;111(17):E1768-E76.
- 703 66. Yoshida H, Kojima T, Yamagishi J-i, Nakamura S. Quinolone-resistant mutations of the  
704 *gyrA* gene of *Escherichia coli*. Molecular and General Genetics MGG. 1988;211(1):1-7.
- 705 67. Yoshida H, Bogaki M, Nakamura M, Nakamura S. Quinolone resistance-determining  
706 region in the DNA gyrase *gyrA* gene of *Escherichia coli*. Antimicrobial agents and chemotherapy.  
707 1990;34(6):1271-2.
- 708 68. Tyson GH, Zhao S, Li C, Ayers S, Sabo JL, Lam C, et al. Establishing genotypic cutoff values  
709 to measure antimicrobial resistance in *Salmonella*. Antimicrobial agents and chemotherapy.  
710 2017;61(3):e02140-16.
- 711 69. Kohanski MA, Dwyer DJ, Hayete B, Lawrence CA, Collins JJ. A common mechanism of  
712 cellular death induced by bactericidal antibiotics. Cell. 2007;130(5):797-810.
- 713 70. Foti JJ, Devadoss B, Winkler JA, Collins JJ, Walker GC. Oxidation of the guanine  
714 nucleotide pool underlies cell death by bactericidal antibiotics. Science. 2012;336(6079):315-9.  
715  
716

717 **Tables**

718

719 **Table 1.** The number of susceptible, intermediate and resistant genomes across the 15  
720 antibiotics for the 5278 *Salmonella* genomes used in this study.

| <b>Antibiotic</b> | <b>Susceptible genomes</b> | <b>Intermediate genomes</b> | <b>Resistant genomes</b> |
|-------------------|----------------------------|-----------------------------|--------------------------|
| AMP               | 3682                       | 2                           | 1593                     |
| AUG               | 4145                       | 355                         | 778                      |
| AXO               | 4508                       | 1                           | 769                      |
| AZI               | 2409                       | 0                           | 7                        |
| CHL               | 5026                       | 87                          | 164                      |
| CIP               | 5217                       | 53                          | 7                        |
| COT               | 5219                       | 0                           | 58                       |
| FIS               | 3356                       | 0                           | 1573                     |
| FOX               | 4501                       | 98                          | 679                      |
| GEN               | 4577                       | 68                          | 633                      |
| KAN               | 837                        | 3                           | 84                       |
| NAL               | 5233                       | 0                           | 45                       |
| STR               | 872                        | 0                           | 1919                     |
| TET               | 2364                       | 28                          | 2885                     |
| TIO               | 4517                       | 8                           | 753                      |

721

722

723  
724  
725  
726  
727

**Table 2.** Very major error (VME) rate, defined as resistant genomes predicted as being susceptible, and major error (ME) rate, defined as susceptible genomes predicted as being resistant, for the 4500-genome model.

| Antibiotic | VME Avg <sup>1</sup> | VME 95% CI <sup>2</sup> | ME Avg <sup>1</sup> | ME 95% CI <sup>2</sup> | Resistant Samples | Susceptible Samples |
|------------|----------------------|-------------------------|---------------------|------------------------|-------------------|---------------------|
| All        | 0.027                | [0.024-0.030]           | 0.001               | [0.001-0.002]          | 10979             | 47366               |
| AMP        | 0.028                | [0.022-0.033]           | 0.000               | [0.000-0.001]          | 1442              | 3054                |
| AUG        | 0.012                | [0.000-0.025]           | 0.000               | [0.000-0.000]          | 746               | 3449                |
| AXO        | 0.022                | [0.011-0.032]           | 0.000               | [0.000-0.001]          | 740               | 3758                |
| AZI        | 0.857                | [0.508-1.207]           | 0.000               | [0.000-0.000]          | 7                 | 2040                |
| CHL        | 0.000                | [0.000-0.000]           | 0.000               | [0.000-0.001]          | 149               | 4271                |
| CIP        | 0.417                | [-0.099-0.933]          | 0.000               | [0.000-0.000]          | 7                 | 4445                |
| COT        | 0.670                | [0.515-0.825]           | 0.000               | [0.000-0.001]          | 55                | 4443                |
| FIS        | 0.039                | [0.026-0.053]           | 0.000               | [0.000-0.000]          | 1479              | 2757                |
| FOX        | 0.009                | [-0.001-0.020]          | 0.000               | [0.000-0.000]          | 651               | 3754                |
| GEN        | 0.090                | [0.066-0.113]           | 0.000               | [0.000-0.000]          | 579               | 3862                |
| KAN        | 0.074                | [0.012-0.136]           | 0.000               | [0.000-0.000]          | 82                | 662                 |
| NAL        | 0.917                | [0.819-1.014]           | 0.000               | [0.000-0.001]          | 39                | 4460                |
| STR        | 0.014                | [0.008-0.020]           | 0.027               | [0.013-0.040]          | 1703              | 744                 |
| TET        | 0.000                | [0.000-0.000]           | 0.018               | [0.012-0.025]          | 2575              | 1901                |
| TIO        | 0.004                | [-0.001-0.009]          | 0.000               | [0.000-0.000]          | 725               | 3766                |

728 <sup>1</sup> Reported within  $\pm 1$  two-fold dilution step

729 <sup>2</sup> 95% confidence interval

730  
731  
732

733  
734  
735

**Table 3.** Model accuracy for the genomes from each sample collection year.

| Collection Date | Accuracy | Genomes | Bins <sup>*</sup> |
|-----------------|----------|---------|-------------------|
| 2002            | 0.97     | 55      | 624               |
| 2003            | 0.95     | 159     | 1809              |
| 2004            | 0.96     | 235     | 2850              |
| 2005            | 0.95     | 274     | 3384              |
| 2006            | 0.95     | 313     | 3880              |
| 2007            | 0.94     | 258     | 3192              |
| 2008            | 0.95     | 388     | 4821              |
| 2009            | 0.95     | 436     | 5367              |
| 2010            | 0.94     | 230     | 2820              |
| 2011            | 0.95     | 214     | 2968              |
| 2012            | 0.96     | 257     | 3694              |
| 2013            | 0.97     | 265     | 3793              |
| 2014            | 0.95     | 506     | 7100              |
| 2015            | 0.95     | 689     | 9646              |
| 2016            | 0.96     | 83      | 1161              |

736 <sup>\*</sup>The total number of MICs available for the genomes isolated in that year  
737  
738  
739

**Table 4.** Model accuracy for the genomes isolated from various sources.

| Source   | Accuracy | Genomes | Bins <sup>*</sup> |
|----------|----------|---------|-------------------|
| Chicken  | 0.96     | 1981    | 25869             |
| Cow/Beef | 0.94     | 419     | 5688              |
| Pig/Pork | 0.95     | 448     | 6144              |
| Turkey   | 0.94     | 1651    | 21260             |

740 <sup>\*</sup>The total number of MICs available for the genomes of each category  
741

**Table 5.** The ability of models trained on genomes from prior years to predict MICs for genomes collected in later years.

| <b>Training set years</b> | <b>Test set years</b> | <b>Accuracy</b> | <b>95% CI</b> | <b>Training Bins*</b> | <b>Testing Bins*</b> | <b>Training Genomes</b> | <b>Testing Genomes</b> |
|---------------------------|-----------------------|-----------------|---------------|-----------------------|----------------------|-------------------------|------------------------|
| 2002-2008                 | 2009-2016             | 0.88            | [0.88-0.89]   | 36563                 | 22412                | 1819                    | 2681                   |
| 2002-2009                 | 2010-2016             | 0.88            | [0.88-0.89]   | 31196                 | 27779                | 2255                    | 2245                   |
| 2002-2010                 | 2011-2016             | 0.88            | [0.88-0.88]   | 28376                 | 30599                | 2485                    | 2015                   |
| 2002-2011                 | 2012-2016             | 0.88            | [0.88-0.89]   | 25408                 | 33567                | 2699                    | 1801                   |
| 2002-2012                 | 2013-2016             | 0.88            | [0.87-0.88]   | 21714                 | 37261                | 2956                    | 1544                   |
| 2002-2013                 | 2014-2016             | 0.86            | [0.86-0.87]   | 17921                 | 41054                | 3221                    | 1279                   |
| 2002-2014                 | 2015-2016             | 0.92            | [0.92-0.92]   | 10807                 | 48168                | 3728                    | 772                    |

\*The total number of genome/antibiotic combinations

**Table 6.** The highest-ranking AMR-related protein function (or genomic region) with a matching k-mer from the XGBoost models.

| Antibiotic       | K-mer Rank | Type of match <sup>1</sup> | k-mer           | PATRIC Annotation(s)                                                                                                                                                      |
|------------------|------------|----------------------------|-----------------|---------------------------------------------------------------------------------------------------------------------------------------------------------------------------|
| AMP              | 1          | direct                     | CTTAATCAGTGAGGC | Class A beta-lactamase (EC 3.5.2.6) => TEM family                                                                                                                         |
| AUG              | 1          | direct                     | AAACGTCTTACTAAC | Class C beta-lactamase (EC 3.5.2.6) => CMY/CMY-2/CFE/LAT family                                                                                                           |
| AXO <sup>2</sup> | 1          | proximity                  | AAAGAGAAAGAAAGG | Class C beta-lactamase (EC 3.5.2.6) => CMY/CMY-2/CFE/LAT family                                                                                                           |
| AZI              | 8          | direct                     | CCCATTTCGCCGCC  | Macrolide 2'-phosphotransferase => Mph(A) family                                                                                                                          |
| CHL <sup>2</sup> | 1          | proximity                  | AGACAAGTAAGCCGC | Chloramphenicol/florfenicol resistance, MFS efflux pump => FloR family                                                                                                    |
| CIP              | 1          | proximity                  | ACAGTCCATCCAGGA | Pentapeptide repeat protein QnrB family => Quinolone resistance protein QnrB10                                                                                            |
| COT <sup>2</sup> | 1          | proximity                  | AAAAACGATAGCTGC | Dihydrofolate reductase (EC 1.5.1.3)                                                                                                                                      |
| FIS <sup>2</sup> | 1          | proximity                  | CGCAACGGCTCAAGC | Dihydropteroate synthase type-2 (EC 2.5.1.15) @ Sulfonamide resistance protein                                                                                            |
| FOX              | 1          | direct                     | AAAAAAACCTTGCA  | Class C beta-lactamase (EC 3.5.2.6) => CMY/CMY-2/CFE/LAT family                                                                                                           |
| GEN              | 1          | proximity                  | AGTTAAGCCGCGCCG | Aminoglycoside 3''-nucleotidyltransferase (EC 2.7.7.-) => APH(3'')-Ia (AadA family); Aminoglycoside N(3)-acetyltransferase (EC 2.3.1.81) => AAC(3)-II,III,IV,VI,VIII,IX,X |
| KAN              | 1          | direct                     | AAAAAGCCGTTTCTG | Aminoglycoside 3'-phosphotransferase (EC 2.7.1.95) => APH(3')-I                                                                                                           |
| NAL              | 1          | direct                     | ATTCCGCAGTGATG  | DNA gyrase subunit A (EC 5.99.1.3)                                                                                                                                        |
| STR              | 1          | direct                     | ATTTGTACGGCTCCG | Aminoglycoside 3''-nucleotidyltransferase (EC 2.7.7.-) => APH(3'')-Ia (AadA family)                                                                                       |
| TET              | 1          | proximity                  | CGTTCTGCCTTGCGC | Tetracycline resistance regulatory protein TetR; Tetracycline resistance, MFS efflux pump => Tet(A)                                                                       |
| TIO <sup>2</sup> | 1          | proximity                  | AAAGAGAAAGAAAGG | Class C beta-lactamase (EC 3.5.2.6) => CMY/CMY-2/CFE/LAT family                                                                                                           |

<sup>1</sup>A "direct" match means that the k-mer is an exact match to the protein-encoding gene, a "proximity" match means that an AMR gene occurs within 3kb of the k-mer. The k-mer sequences and the top k-mers for each antibiotic are shown in Tables S7-21.

<sup>2</sup>Has other AMR genes within 3kb listed in Tables S7-21.

**Table 7.** Important k-mers used by the individual antibiotic models for predicting susceptible MICs.

| Antibiotic | k-mer           | Sus <sup>1</sup> | Res <sup>1</sup> | Frac Sus <sup>2</sup> | Frac Res <sup>2</sup> | Genomic region <sup>3</sup> | PATRIC annotation or genomic region                                                                                                         |
|------------|-----------------|------------------|------------------|-----------------------|-----------------------|-----------------------------|---------------------------------------------------------------------------------------------------------------------------------------------|
| NAL        | ATCCGCAGTGTATG  | 5233             | 45               | 1.00                  | 0.38                  | PEG                         | DNA gyrase subunit A (EC 5.99.1.3)                                                                                                          |
| AXO        | TGGTATTCGCATCAA | 4508             | 769              | 0.78                  | 0.48                  | PEG                         | Phosphoethanolamine transferase EptA                                                                                                        |
| KAN        | CTGGCTTTTTTTTTT | 837              | 84               | 0.30                  | 0.00                  | RNA                         | RyhB RNA                                                                                                                                    |
| STR        | CCCTTATCCAACACG | 872              | 1919             | 0.85                  | 0.55                  | PEG                         | Respiratory nitrate reductase delta chain (EC 1.7.99.4)                                                                                     |
| AXO        | CAGAACCAGAATTTG | 4508             | 769              | 0.74                  | 0.46                  | PEGs                        | Formate-dependent nitrite reductase complex subunit Nrff, and Cytochrome c-type heme lyase subunit nrfE, nitrite reductase complex assembly |
| TIO        | AGAGAAGCCTGCCGC | 4517             | 753              | 0.68                  | 0.40                  | PEG                         | Oxaloacetate decarboxylase alpha chain (EC 4.1.1.3)                                                                                         |
| AXO        | ATCCCCGCCATTACA | 4508             | 769              | 0.73                  | 0.46                  | PEG                         | Tagatose-1,6-bisphosphate aldolase GatY (EC 4.1.2.40)                                                                                       |
| AXO        | TGCTGCAAAACGCCA | 4508             | 769              | 0.69                  | 0.45                  | PEG                         | Protein AraJ precursor                                                                                                                      |
| AXO        | GAAAACAGGGTGTAG | 4508             | 769              | 0.47                  | 0.23                  | INT                         | Upstream of llvGMEDA operon leader peptide                                                                                                  |
| FOX        | GGATACCACGCCGGG | 4501             | 679              | 0.58                  | 0.35                  | PEGs                        | Glucose dehydrogenase, PQQ-dependent (EC 1.1.5.2), and IncF plasmid conjugative transfer protein TraP                                       |

<sup>1</sup> Total number of susceptible and resistant genomes in the entire collection

<sup>2</sup> Fraction of susceptible and resistant genomes with the k-mer in the entire collection

<sup>3</sup> PEG is protein-encoding gene, RNA is RNA gene, INT is intergenic region



## Figure Legends

**Figure 1.** MIC prediction model accuracy for subsamples of genomes. Diverse subsamples of genomes were chosen and the model accuracy within  $\pm 1$  two-fold dilution step based on a 10-fold cross validation is shown with the red plot line. The dashed line represents the high and low values for the 95% confidence interval for the average accuracy at each given plot point.

**Figure 2.** Box plot of the overall accuracies within  $\pm 1$  two-fold dilution step for each antibiotic in the 4500-genome model. The Y-axis depicts each antibiotic (abbreviations are defined in Materials and Methods). The X-axis depicts the accuracy. Each vertical red line represents the median accuracy over the holdout sets for each fold in the ten-fold cross validation. The blue box encompasses the data of the first and third quartiles. The dashed blue horizontal lines bounded by black vertical lines (or “whiskers”) depict the entire distribution of accuracies for each fold and antibiotic. The accuracy of the entire 4500 genome model over all antibiotics and folds is depicted in the row marked “ALL”.

**Figure 3.** The accuracy of the MIC prediction model based on 4,500 diverse genomes. The heat map depicts the accuracy within  $\pm 1$  two-fold dilution step of the laboratory-derived MIC. The X-axis shows the MIC ( $\mu\text{g/ml}$ ) and each antibiotic is shown on the Y-axis. The accuracy for each antibiotic-MIC combination is depicted by color with bright yellow/green being the most accurate and red being the least accurate. The values shown in each cell are the number of genomes with that MIC for a given antibiotic.

**Figure 4.** The average accuracy of the model based on 4,500 diverse genomes for predicting MICs for the *Salmonella* genomes from each state. Light blue is most accurate and dark blue/black is least accurate. Note that the scale starts at an accuracy of 0.90. Each state is labeled with the number of genomes collected from that state. States without a label contain no samples and are colored in grey; no genomes exist in the collection from Alaska and Hawaii.

### Model Accuracy vs. Genomes Used

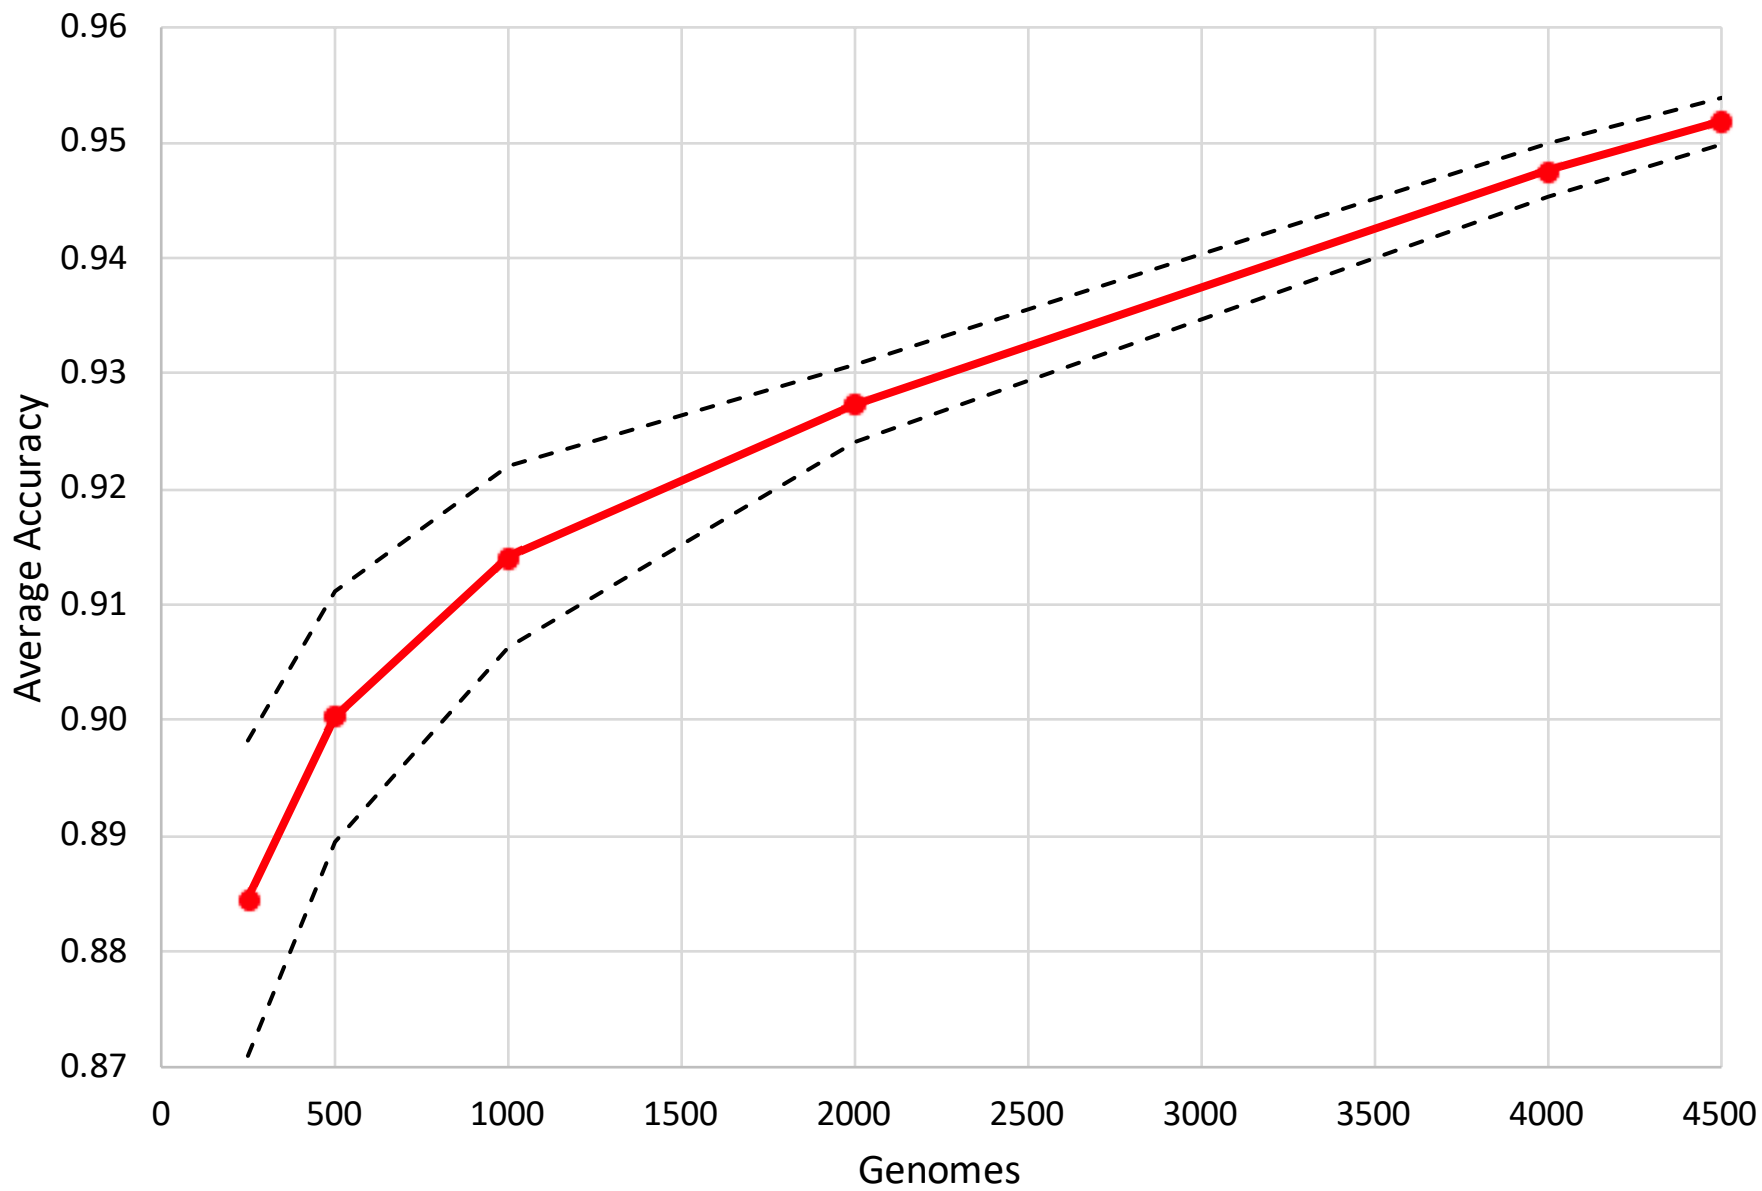

# Overall Accuracy by Antibiotic

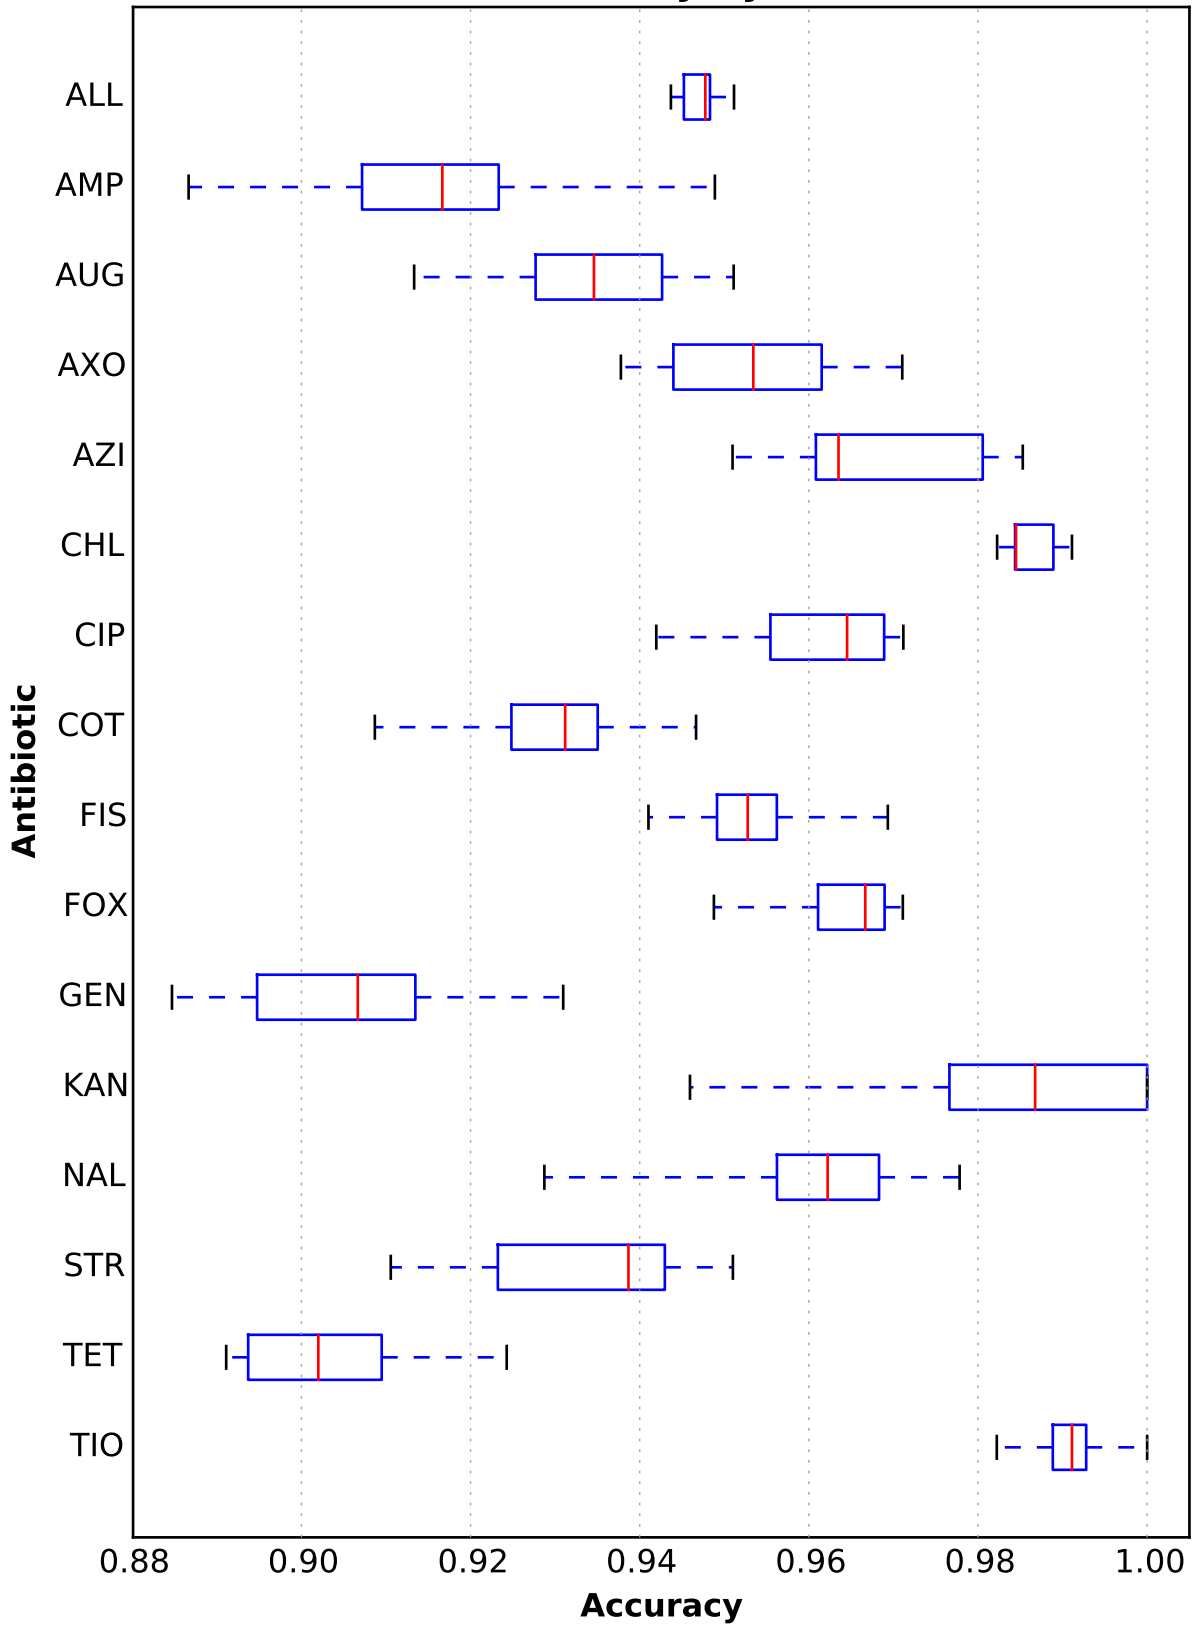

## 4500 Genome Model

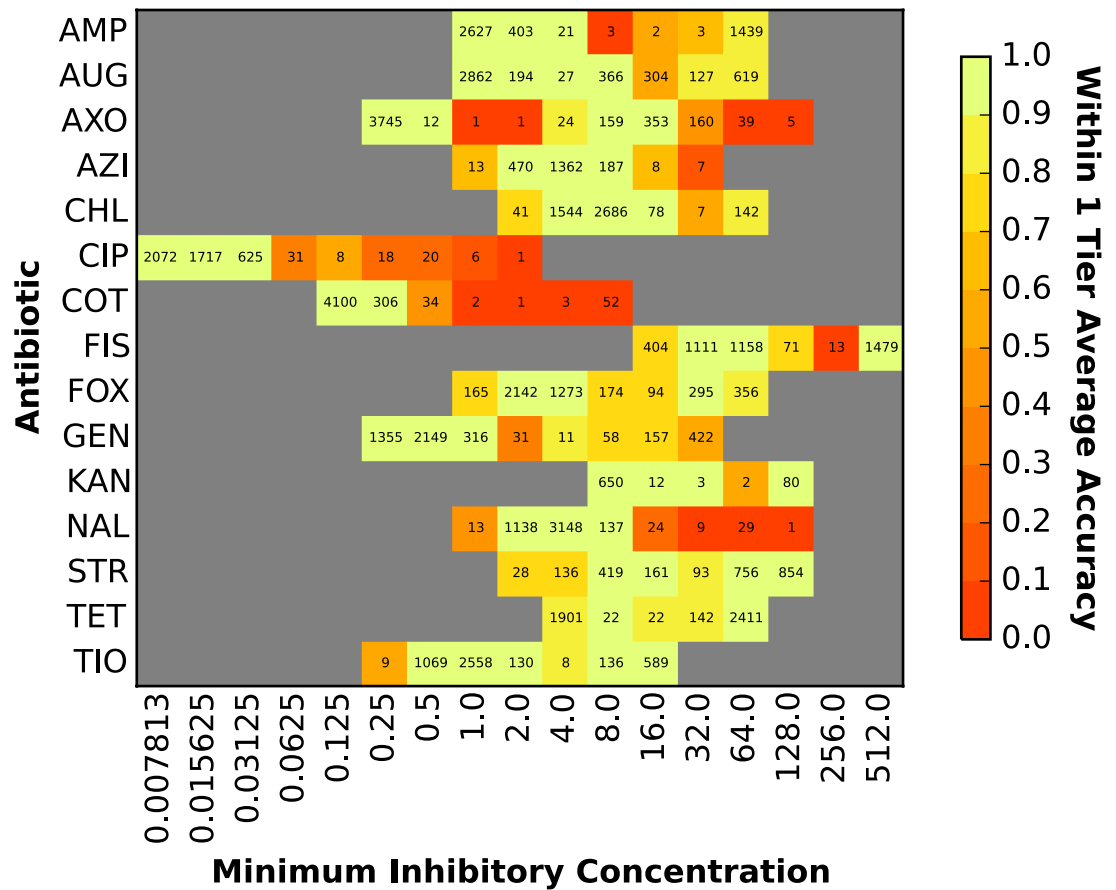

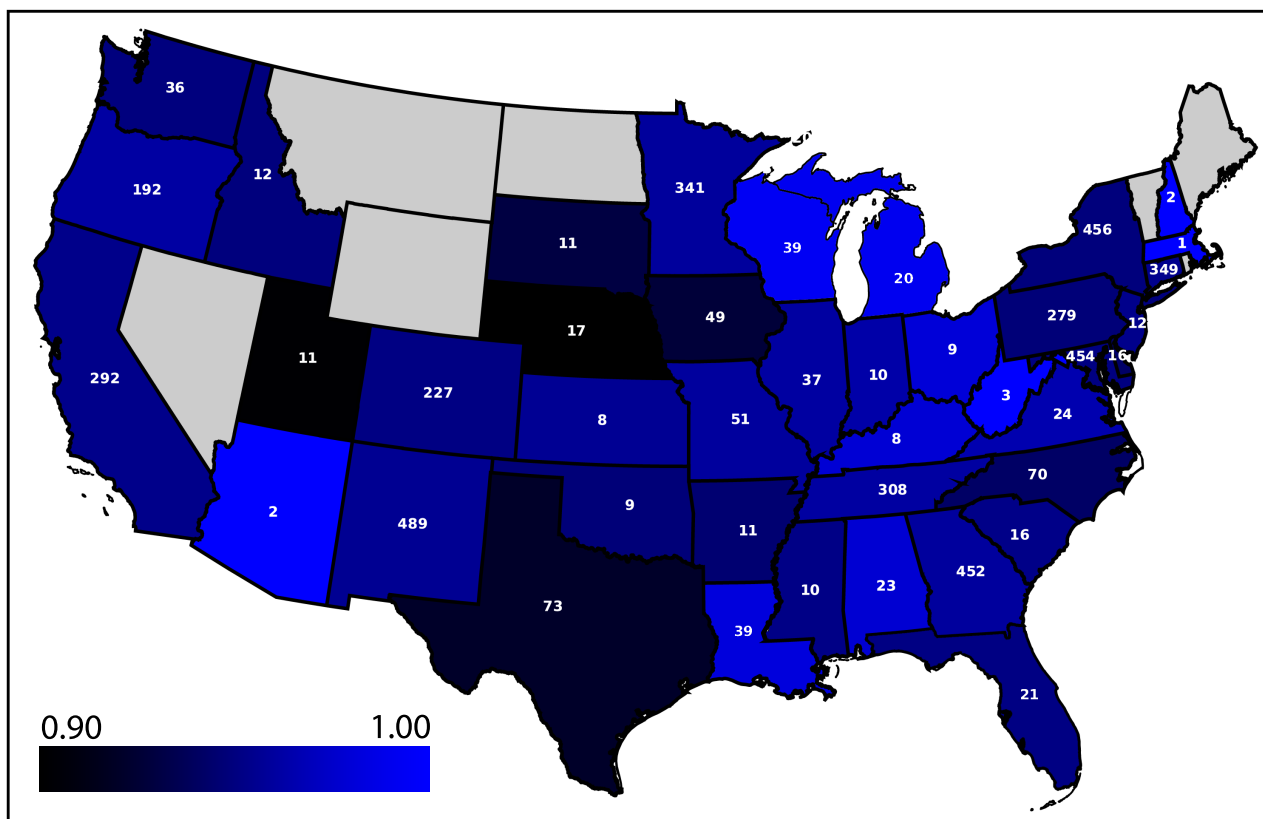

Source: https://www.biorxiv.org/content/10.1101/380782v2.full.pdf
